# Supplementary material
Source: ML conference proceedings conference paper supplement (https://openaccess.thecvf.com/content/WACV2022/html/Kim_Learning_Color_Representations_WACV_2022_paper.html)
Supplement: Supplementary file 1 [file Kim_Learning_Color_Representations_WACV_2022_supplemental.pdf]

## A. Implementation details

Our model consists of three  $\gamma$ CRG and each CRG has five  $\gamma$ CRB. All the convolutional layers are implemented with a kernel size of 3, a stride of 1, and padding of 1. All the channels of intermediate feature maps are maintained as 48, and only input and output convolution of CRG changes the channels as 3 to 48 and 48 to 3, respectively. We randomly crop 30 patches of  $100 \times 100$  pixels from each training image.  $\lambda_1, \lambda_2$  for loss function are set to 1. The model is trained for 100 epochs. We use Adam [14] optimizer with default parameters. The learning rate is set as 0.001 at first and is halved at [20, 40, 60, 90] epochs. Please refer to the code for more detailed settings. We train our model on NVIDIA Titan Xp, V, and RTX A6000 GPUs.

## B. Kernel functions

We hypothesized that using the derivative of a step-like function as a kernel will be more suitable for estimation of color histograms. Figure 8 shows the graphs of our step-like function, the logistic regression function used by [2], and their corresponding derivatives. Along with our motivation, our estimation yields much smaller estimation errors (Figure 4).

## C. Quantitative comparison on LOL\* dataset

LOL\* [29] denotes the original dataset with 15 test samples and 485 training images. For a fair comparison, we experimented with more test samples than the original LOL\* dataset (Table 1). Table 3 shows the quantitative results with the original 15 test images. Similarly, in this experiment, the proposed CCM achieves the best performance.

## D. More qualitative comparison results

Figures 9-11 illustrate the qualitative results of the CCM and the state-of-the-art comparison methods on the real-world dataset. Figures 12-14 show the qualitative results on the synthetic dataset. The proposed CCM achieved superior perceptual quality while recovering the original illumination and color distribution.

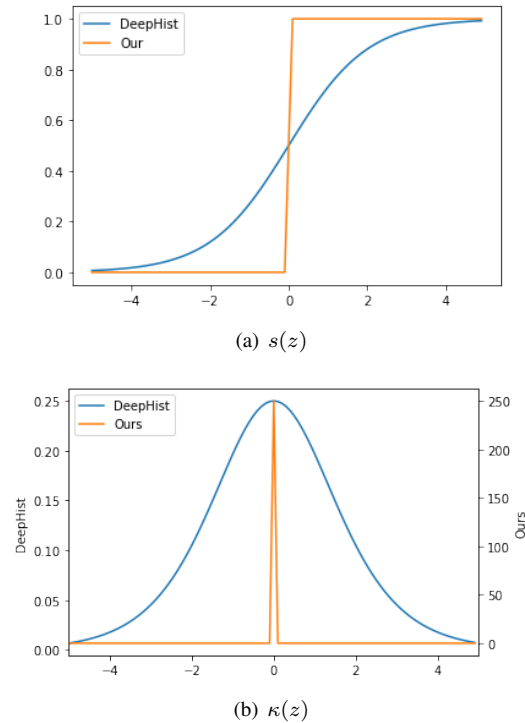

Figure 8.  $\kappa(z)$  and  $s(z)$  for the differentiable histogram estimation.

|      | CLAHE  | BPDHE  | Dong   | SRIE        | DHECE  | MF     | EFF           | CRM           |
|------|--------|--------|--------|-------------|--------|--------|---------------|---------------|
| PSNR | 9.46   | 12.1   | 17.38  | 12.21       | 17.97  | 18.03  | 14.91         | 18.08         |
| SSIM | 0.3854 | 0.3559 | 0.5895 | 0.5793      | 0.5187 | 0.6292 | 0.6866        | 0.7318        |
| WD   | 2301.4 | 1844.8 | 843.2  | 1370.2      | 1309.2 | 808.8  | 1578.9        | 3073.9        |
|      | LIME   | JED    | RRM    | Retinex-Net | KinD   | EG     | DRBN          | CCM           |
| PSNR | 18.10  | 14.17  | 14.24  | 17.73       | 21.56  | 19.61  | <u>22.27</u>  | <b>26.97</b>  |
| SSIM | 0.6007 | 0.7127 | 0.7150 | 0.7742      | 0.8870 | 0.7271 | <u>0.8903</u> | <b>0.9405</b> |
| WD   | 864.6  | 1591.7 | 1555.8 | 1143.9      | 704.8  | 781.8  | <u>564.4</u>  | <b>463.6</b>  |

Table 3. The quantitative comparison results with other state-of-the-art methods on the LOL datasets[29]. The proposed method achieved the new state-of-the-art performance on the LOL datasets. **Bold** and underline indicate the best and the second best score, respectively.

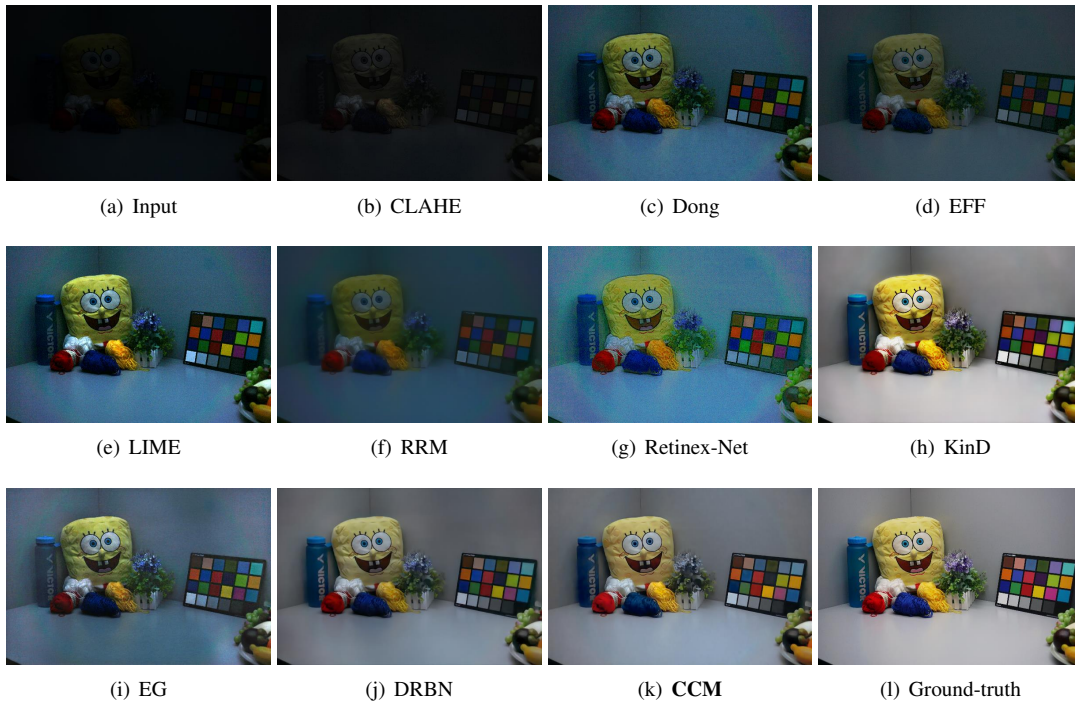

Figure 9. Qualitative evaluation results on the real-world dataset [29].

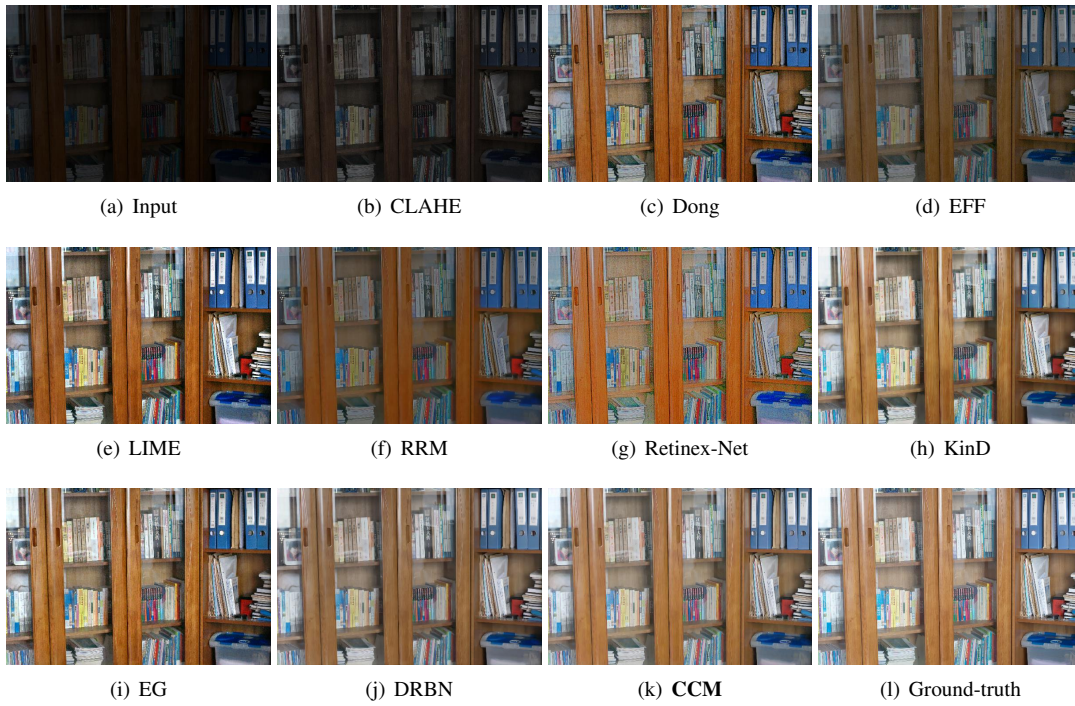

Figure 10. Qualitative evaluation results on the real-world dataset [29].

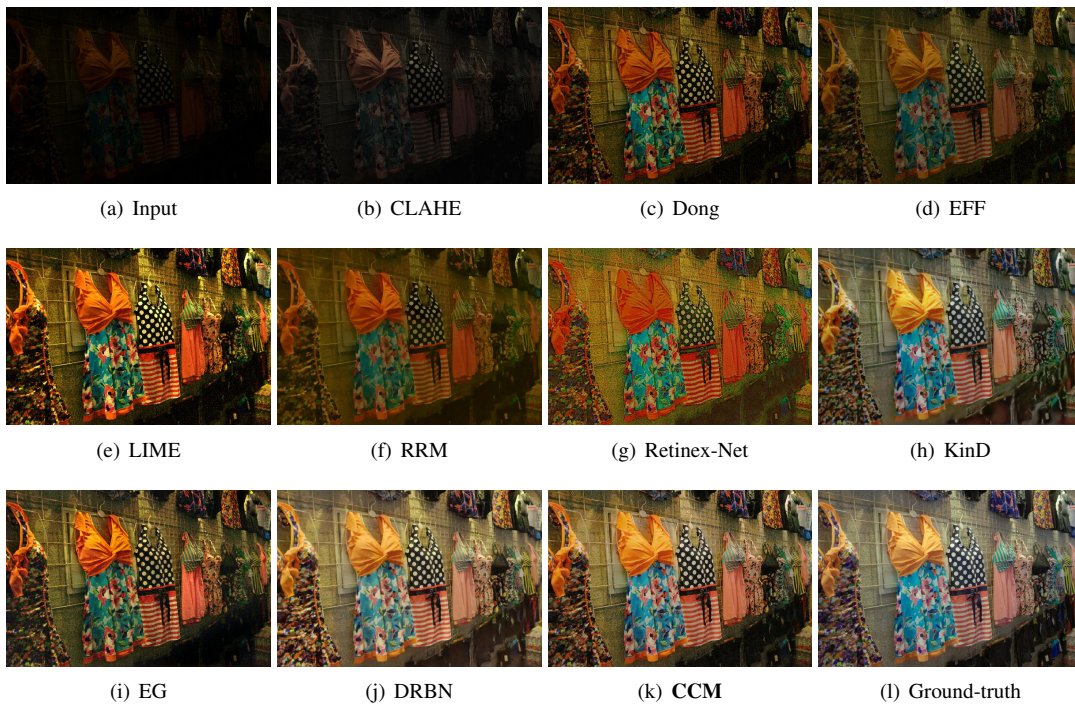

Figure 11. Qualitative evaluation results on the real-world dataset [29].

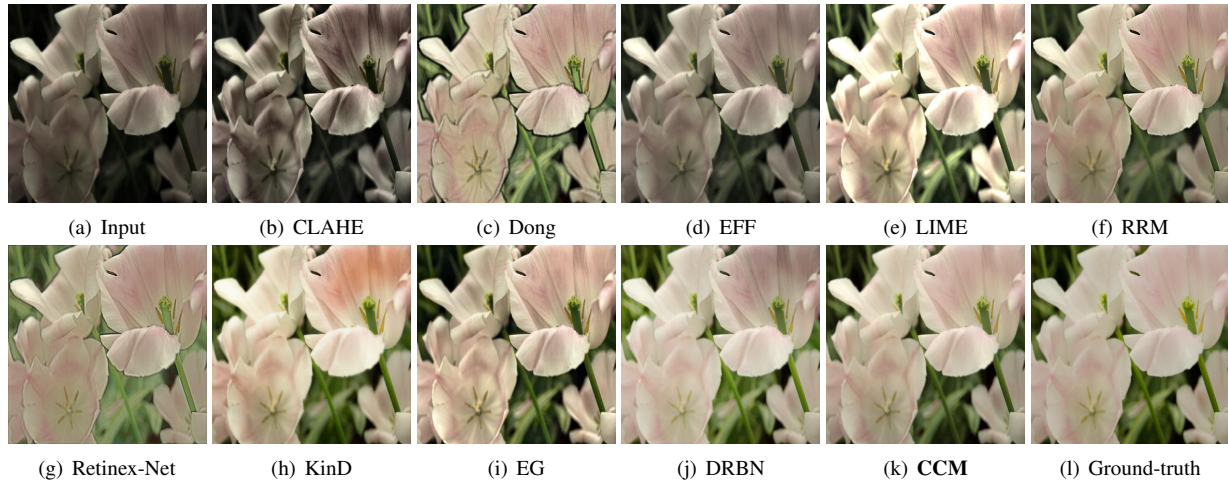

Figure 12. Qualitative evaluation results on the synthetic dataset [29].

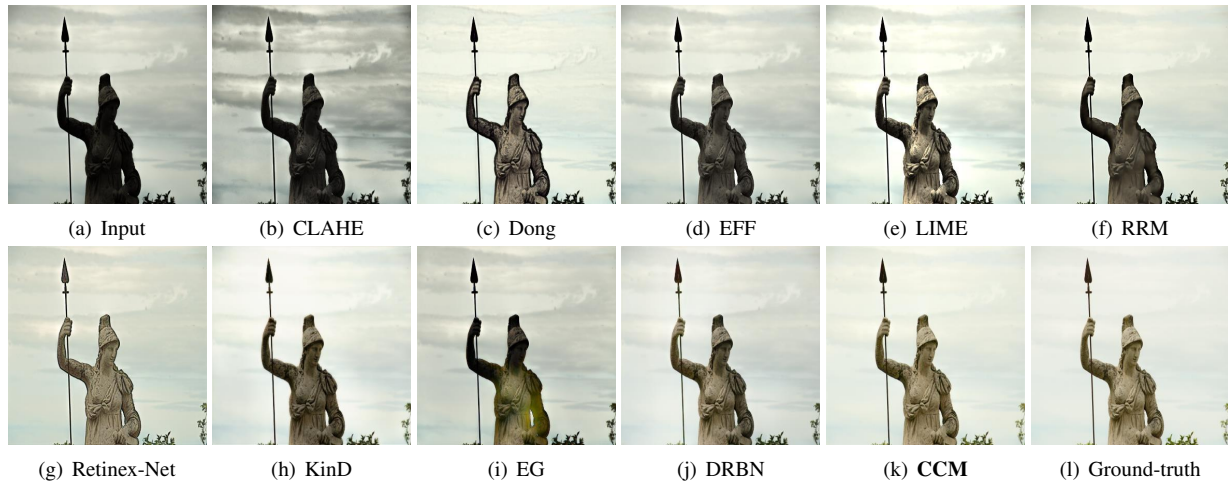

Figure 13. Qualitative evaluation results on the synthetic dataset [29].

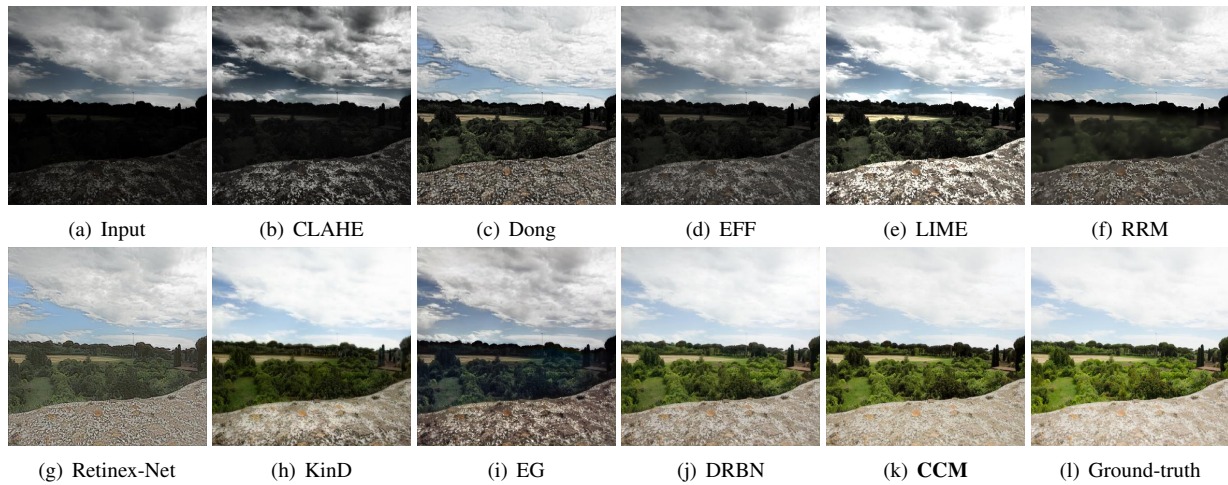

Figure 14. Qualitative evaluation results on the synthetic dataset [29].
